# Supplementary material for: Helicobacter pylori CagA Induces Cortactin Y-470 Phosphorylation-Dependent Gastric Epithelial Cell Scattering via Abl, Vav2 and Rac1 Activation
Source: MDPI journal article supplement (doi:10.3390/cancers13164241), 2021-08-23

Figure 1

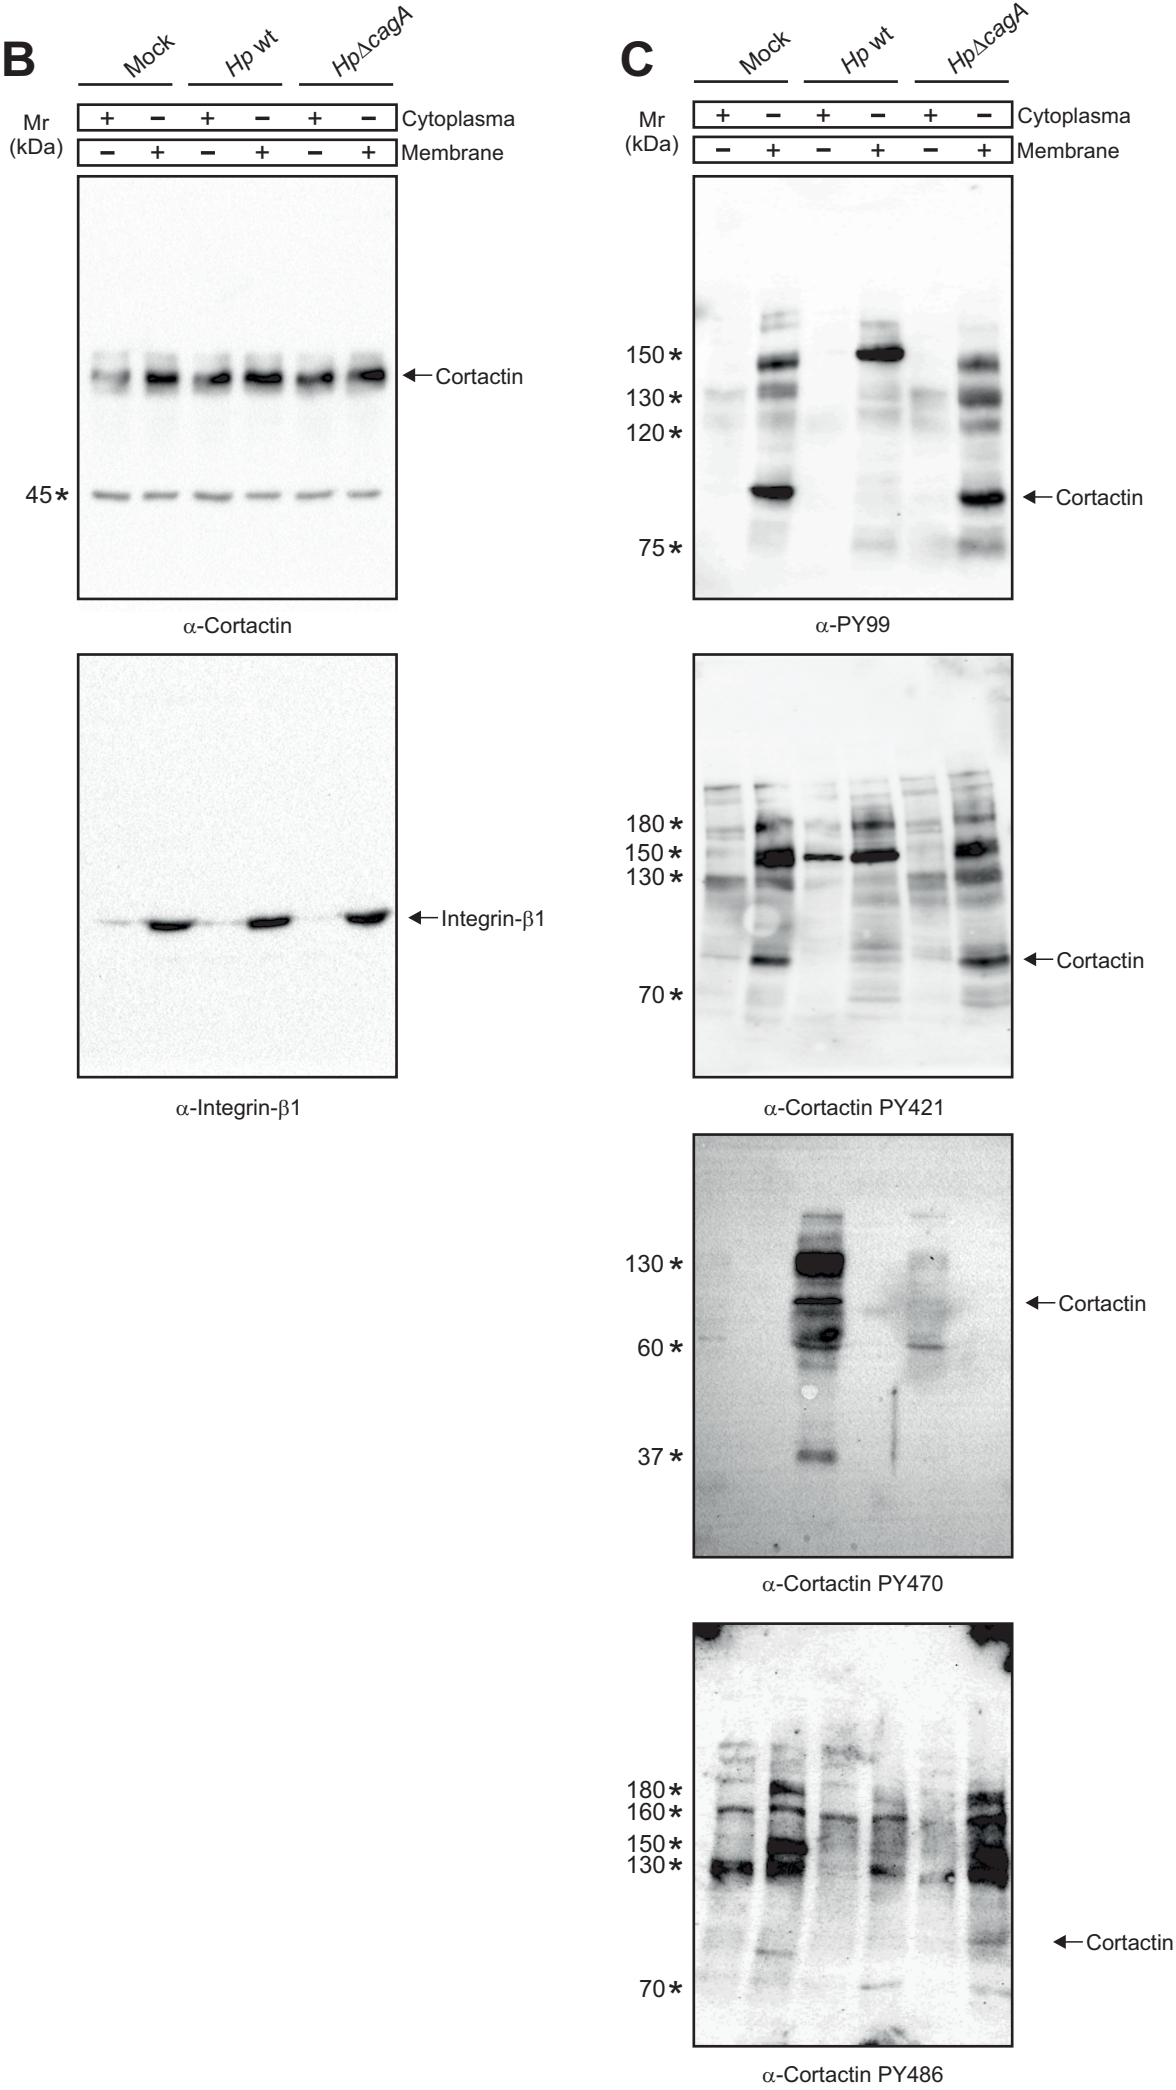

Figure 2

**A**

|          |   |   |   |   |              |
|----------|---|---|---|---|--------------|
|          | - | + | + | + | <i>Hp</i> wt |
|          | - | - | + | - | Imatinib     |
| Mr (kDa) | - | - | - | + | SKI-DV2-43   |

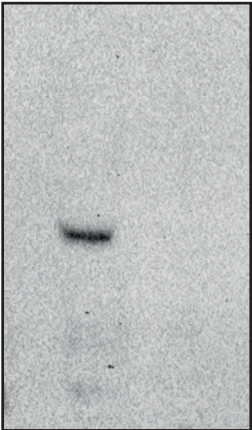

← Abl

$\alpha$ -Abl PY412

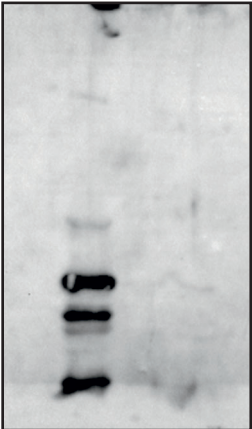

← Cortactin

60 \*

$\alpha$ -Cortactin PY470

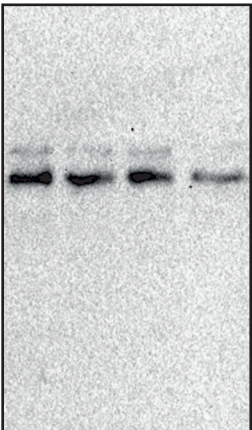

← Cortactin

$\alpha$ -Cortactin

**D**

|          |      |              |                         |
|----------|------|--------------|-------------------------|
|          | Mock | <i>Hp</i> wt | <i>Hp</i> $\Delta$ cagA |
| Mr (kDa) |      |              |                         |

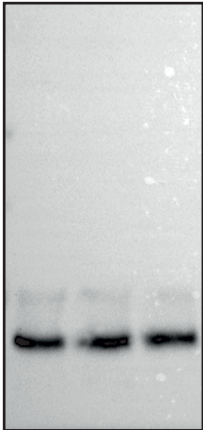

← Cortactin

$\alpha$ -Cortactin

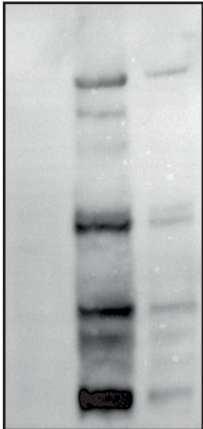

170 \*

60 \*

← Cortactin

$\alpha$ -Cortactin PY470

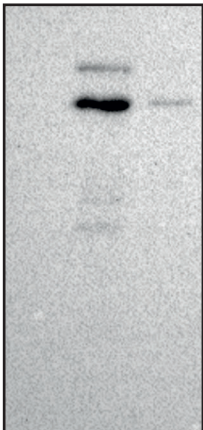

← Vav2

$\alpha$ -Vav2

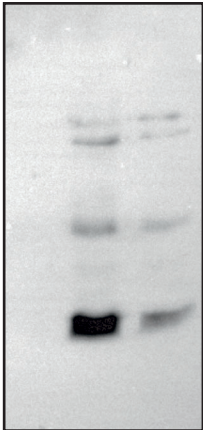

← Rac1

$\alpha$ -Rac1

# Figure 3

**A**

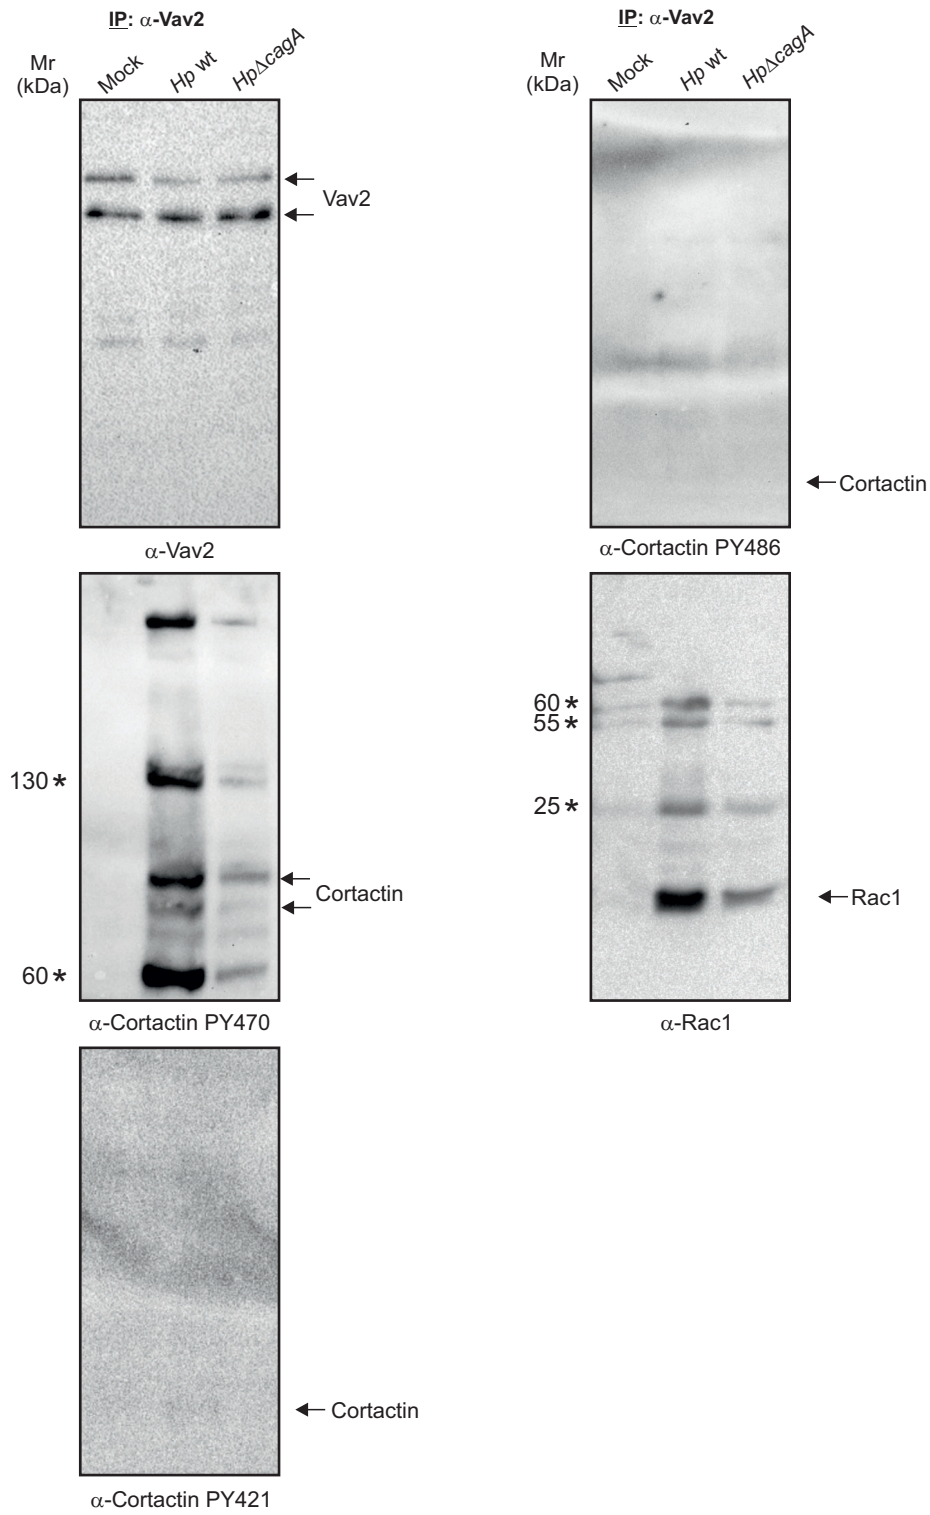

Figure 4

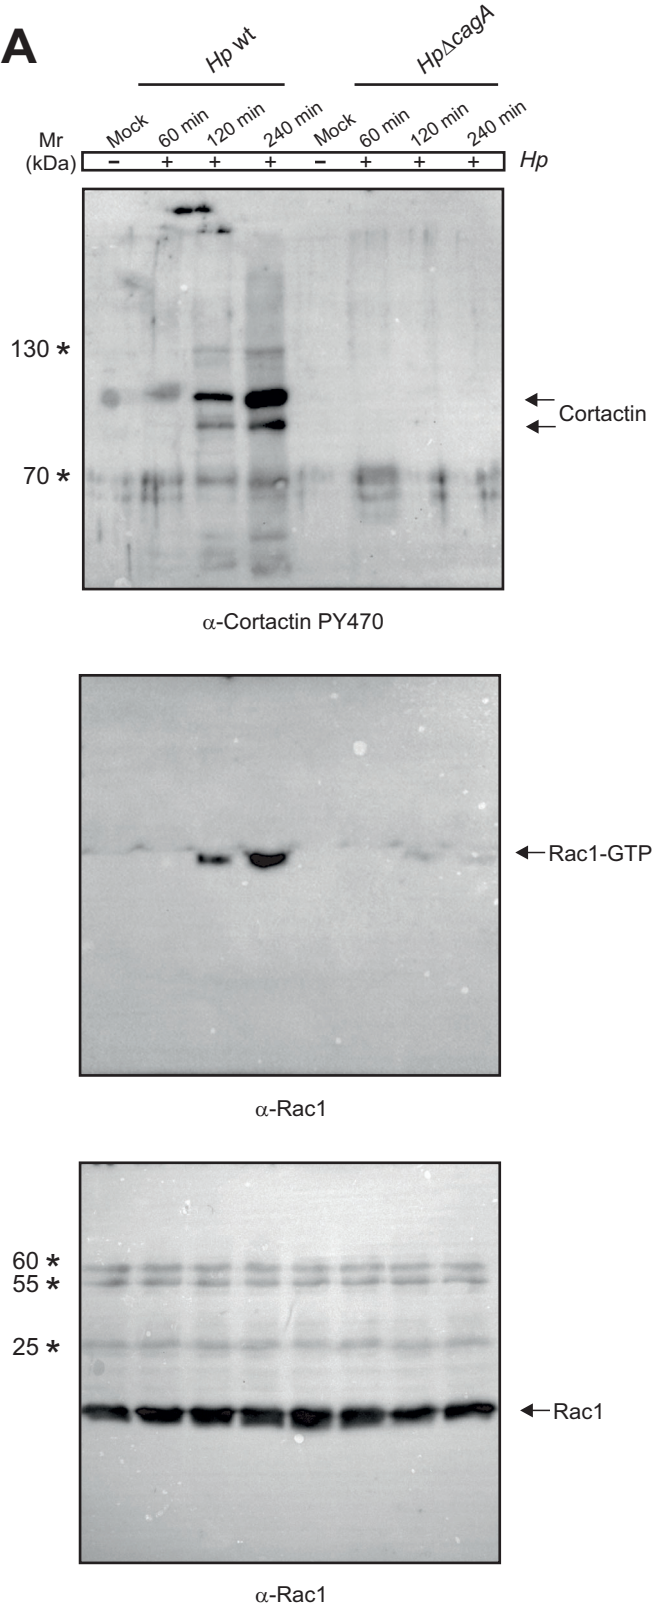



Figure 5

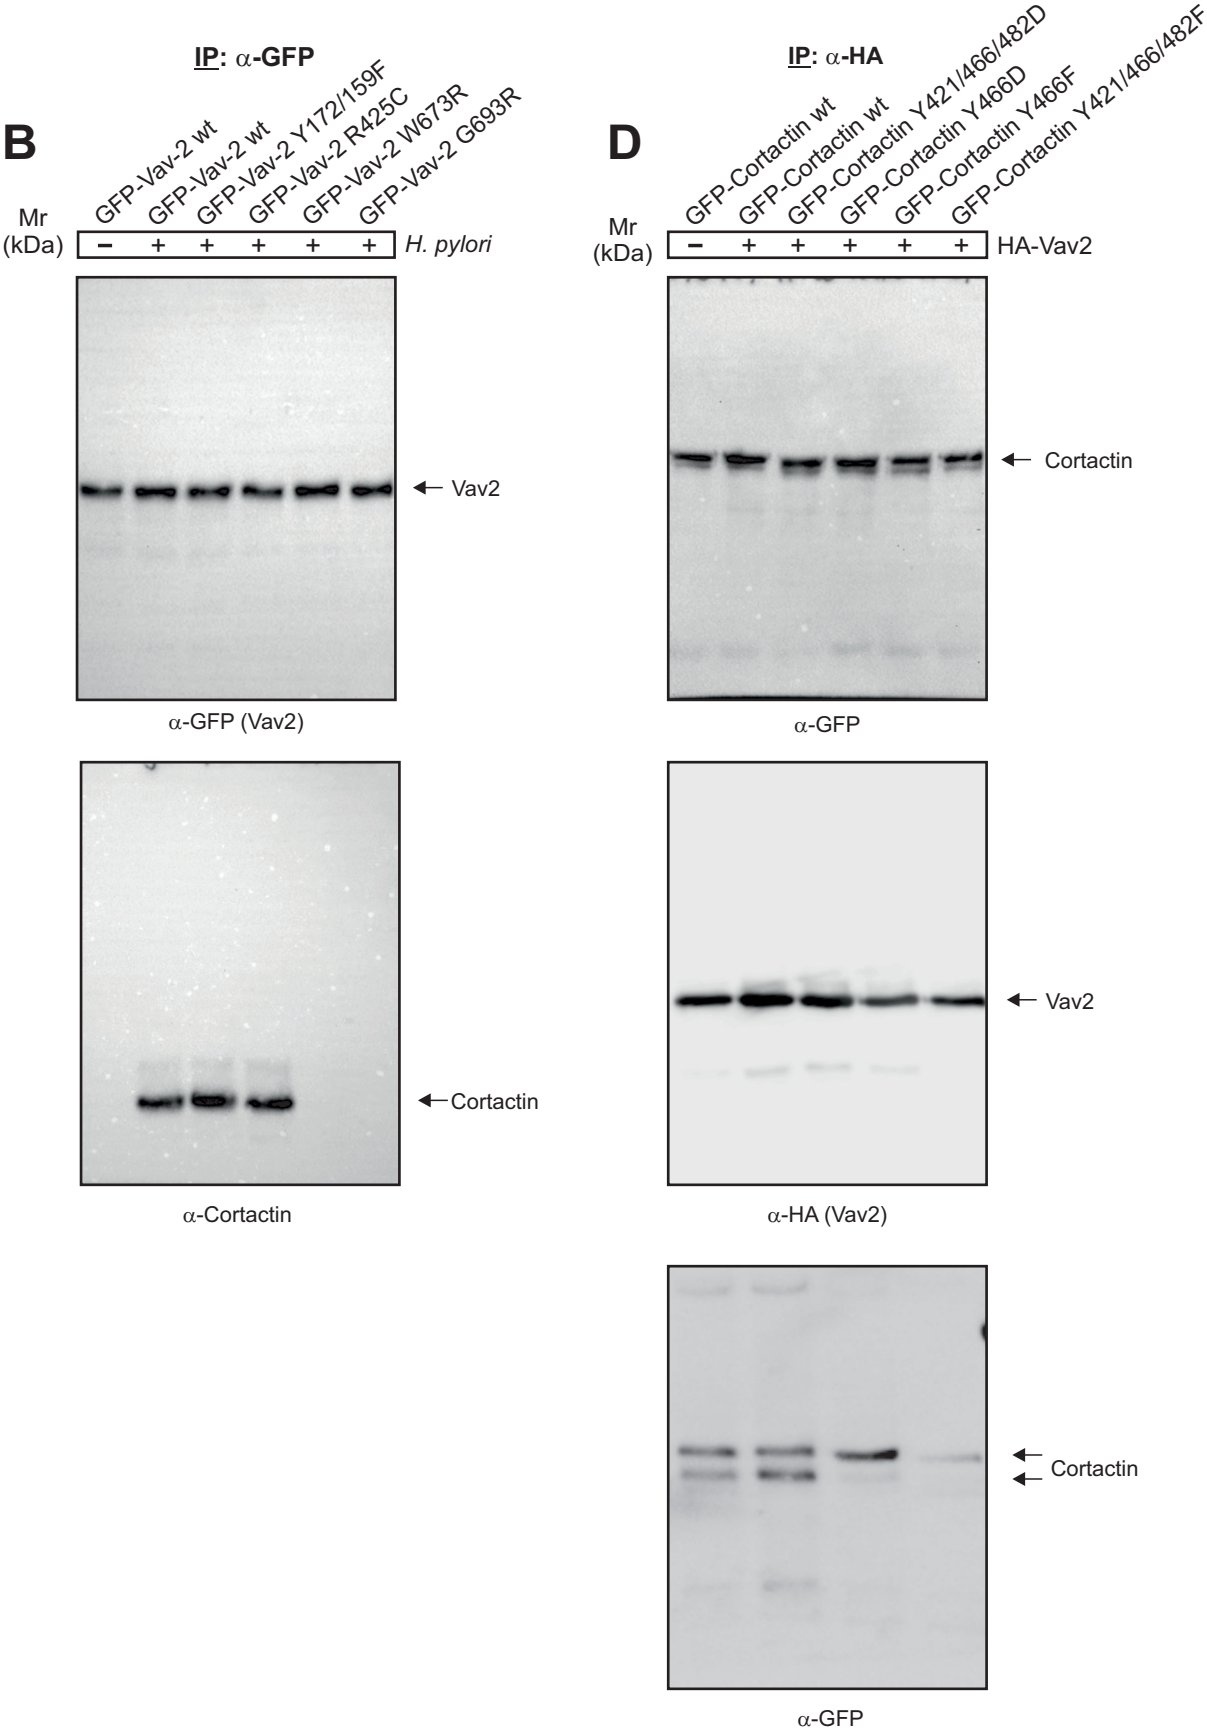

Figure 6

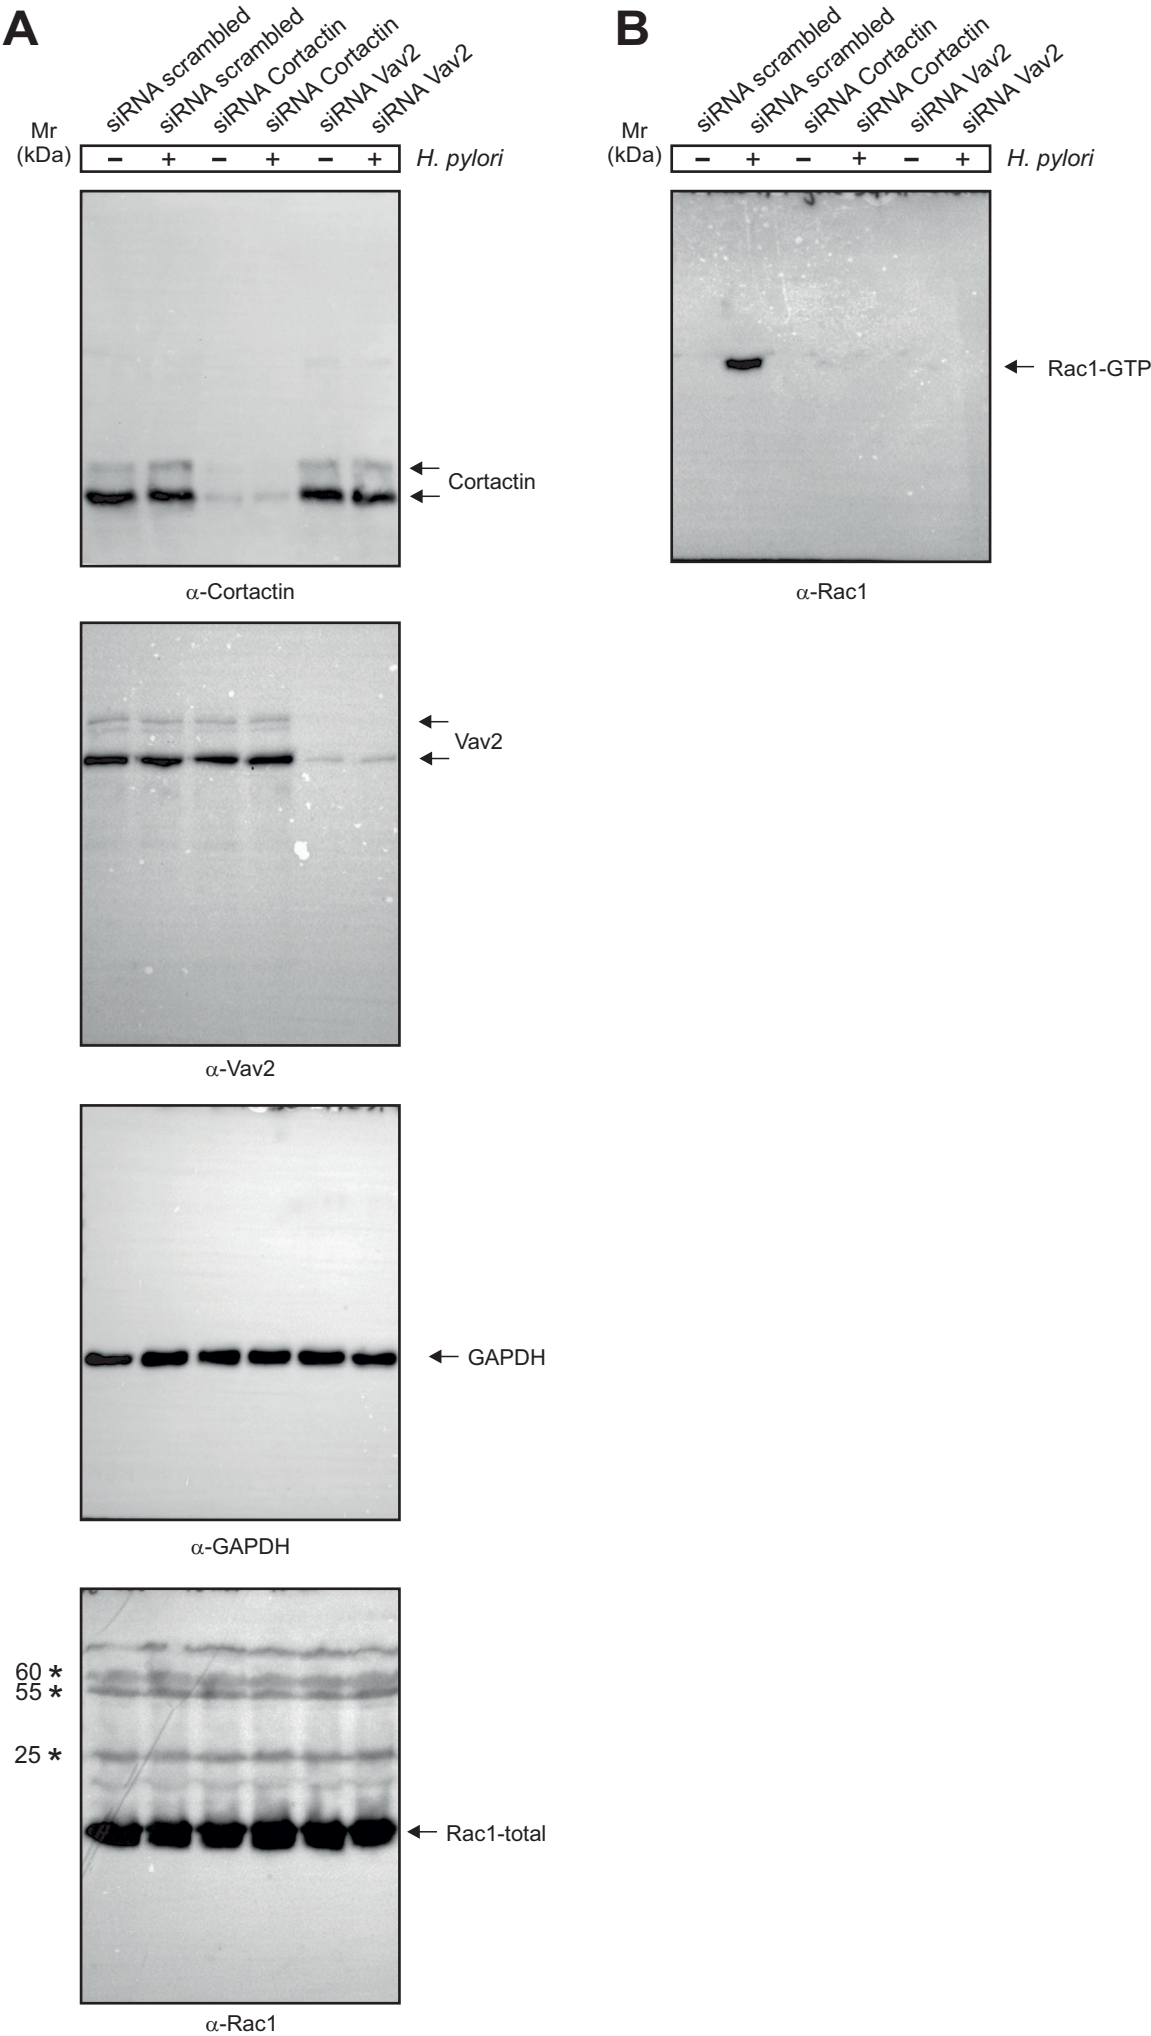

Supplement: s1 [file s1]
