# Supplementary material for: Helicobacter pylori CagA Induces Cortactin Y-470 Phosphorylation-Dependent Gastric Epithelial Cell Scattering via Abl, Vav2 and Rac1 Activation
Source: MDPI journal article supplement (doi:10.3390/cancers13164241), 2021-08-23
Supplement: s1 [file s1]

Supplementary

# ***Helicobacter pylori* CagA Induces Cortactin Y-470 Phosphorylation-Dependent Gastric Epithelial Cell Scattering via Abl, Vav2 and Rac1 Activation**

Nicole Tegtmeyer, Aileen Harrer, Klemens Rottner and Steffen Backert

**Table S1.** Key resources of the present study.

| Reagent                                                              | Source                                                   | Identifier                         |
|----------------------------------------------------------------------|----------------------------------------------------------|------------------------------------|
| <b>Antibodies</b>                                                    |                                                          |                                    |
| Mouse monoclonal anti-GAPDH                                          | Santa Cruz Biotechnology, Dallas, TX, USA                | Cat# sc-47724; RRID:AB_627678      |
| Mouse monoclonal anti-phosphotyrosine PY99                           | Santa Cruz Biotechnology, Dallas, TX, USA                | Cat# sc-7020; RRID:AB_628123       |
| Rabbit polyclonal anti-CagA                                          | Austral Biologicals, San Ramon, CA, USA                  | Cat# HPP-5003-9; RRID: AB_10920428 |
| Mouse monoclonal anti- $\beta$ -Actin                                | Sigma-Aldrich, St. Louis, MO, USA                        | Cat# A5441, RRID:AB_476744         |
| Mouse monoclonal anti-AIIB2 integrin- $\beta$ 1                      | Developmental Studies Hybridoma Bank, Iowa City, IA, USA | Cat#AB_528306; RRID:AB_528306      |
| Rabbit polyclonal anti-Vav2                                          | Santa Cruz Biotechnology, Dallas, TX, USA                | Cat# sc-20803; RRID:AB_793922      |
| Mouse monoclonal anti-Rac1                                           | Cytoskeleton, Denver, CO, USA                            | Cat# ARC03; RRID:AB_2721173        |
| Mouse monoclonal anti-Cortactin                                      | Merck-Millipore, Burlington, MA, USA                     | Cat# 05-180; RRID:AB_309647        |
| Rabbit polyclonal anti-Cortactin, phospho-specific (Tyr421)          | Merck-Millipore, Burlington, MA, USA                     | Cat# AB3852; RRID:AB_177443        |
| Rabbit polyclonal anti-Cortactin, phospho-specific (Tyr466)          | Merck-Millipore, Burlington, MA, USA                     | Cat# AB3795; RRID:AB_569553        |
| Rabbit polyclonal anti-Cortactin, phospho-specific (Tyr486) antibody | Merck-Millipore, Burlington, MA, USA                     | Cat# AB3853; RRID:AB_177444        |
| Rabbit polyclonal anti-Abl, phospho-specific (Y412)                  | Sigma-Aldrich, St. Louis, MO, USA                        | Cat# 07-788; RRID:AB_612042        |
| Rabbit polyclonal anti-GFP                                           | Thermo Fisher Scientific, Waltham, MA, USA               | Cat# A-11122; RRID:AB_221569       |
| Goat polyclonal anti-Rabbit IgG (H + L) Cross-Adsorbed, FITC         | Thermo Fisher Scientific, Waltham, MA, USA               | Cat# F-2765, RRID:AB_253652        |
| Rabbit polyclonal anti-Vav2                                          | Proteintech, Rosemont, IL, USA                           | Cat# 21924-1-AP, RRID:AB_11182283  |
| Goat anti-Rabbit IgG (H + L), HRP                                    | Thermo Fisher Scientific, Waltham, MA, USA               | Cat# 31462; RRID:AB_228338         |
| Goat anti-Mouse IgG, IgM (H + L), HRP                                | Thermo Fisher Scientific, Waltham, MA, USA               | Cat# 31446; RRID:AB_228318         |
| <b>Bacterial Strains</b>                                             |                                                          |                                    |
| <i>Helicobacter pylori</i> strain P1                                 | [1]                                                      | not available                      |

|                                       |                                                 |                                                                                                                                                                                            |
|---------------------------------------|-------------------------------------------------|--------------------------------------------------------------------------------------------------------------------------------------------------------------------------------------------|
| <i>Helicobacter pylori</i> strain P12 | [2]                                             | not available                                                                                                                                                                              |
| <b>Inhibitors</b>                     |                                                 |                                                                                                                                                                                            |
| Imatinib mesylate                     | Sigma-Aldrich, St. Louis, MO, USA               | Cat# SML1027                                                                                                                                                                               |
| SKI-DV2-43                            | [3]                                             | not available                                                                                                                                                                              |
| <b>Commercial Kits</b>                |                                                 |                                                                                                                                                                                            |
| Bradford assay kit                    | Bio-Rad, Hercules, CA, USA                      | Cat# 5000002                                                                                                                                                                               |
| Rac1 activation assay kit             | Cytoskeleton, Denver, CO, USA                   | Cat# BK035                                                                                                                                                                                 |
| <b>Cell Lines</b>                     |                                                 |                                                                                                                                                                                            |
| AGS                                   | ATCC, Manassas, VA, USA                         | Cat# CRL-1739;<br>RRID:CVCL_0139                                                                                                                                                           |
| <b>siRNA Oligonucleotides</b>         |                                                 |                                                                                                                                                                                            |
| Cortactin siRNA (h)                   | Santa Cruz Biotechnology, Dallas, TX, USA       | Cat# sc-35093                                                                                                                                                                              |
| Control siRNA-A                       | Santa Cruz Biotechnology, Dallas, TX, USA       | Cat# sc-37007                                                                                                                                                                              |
| Vav2 siRNA (h)                        | Santa Cruz Biotechnology, Dallas, TX, USA       | Cat# sc-41738                                                                                                                                                                              |
| Rac1 siRNA (h)                        | Santa Cruz Biotechnology, Dallas, TX, USA       | Cat# sc-36351                                                                                                                                                                              |
| <b>Recombinant DNA Plasmids</b>       |                                                 |                                                                                                                                                                                            |
| Mouse Cortactin wt-EGFP               | [4]                                             | not available                                                                                                                                                                              |
| Mouse Cortactin Y421/466/482F-EGFP    | [4]                                             | not available                                                                                                                                                                              |
| Mouse Cortactin Y421/466/482D-EGFP    | [4]                                             | not available                                                                                                                                                                              |
| Mouse Cortactin Y466F-EGFP            | [4]                                             | not available                                                                                                                                                                              |
| Mouse Cortactin Y466D-EGFP            | [4]                                             | not available                                                                                                                                                                              |
| Human Vav2 wt (HA-tagged)             | S. Moores (Harvard Medical School, Boston, USA) | not available                                                                                                                                                                              |
| Human Vav2 wt-EGFPC2                  | [5]                                             | not available                                                                                                                                                                              |
| Human Vav2 Y159F/Y172F-EGFPC2         | [5]                                             | not available                                                                                                                                                                              |
| Human Vav2 R425C-EGFPC2               | [5]                                             | not available                                                                                                                                                                              |
| Human Vav2 W673R-EGFPC2               | [5]                                             | not available                                                                                                                                                                              |
| Human Vav2 G693R-EGFPC2               | [5]                                             | not available                                                                                                                                                                              |
| <b>Software and Algorithms</b>        |                                                 |                                                                                                                                                                                            |
| GraphPad Prism v8.0                   | GraphPad Software, San Diego, CA, USA           | <a href="http://www.graphpad.com">www.graphpad.com</a><br>(accessed on: 20 August 2021)                                                                                                    |
| ImageJ-win64 v2.0                     | [6]                                             | <a href="https://imagej.nih.gov/ij/">https://imagej.nih.gov/ij/</a><br>(accessed on: 20 August 2021)                                                                                       |
| LAS AF v4.0                           | Leica Microsystems, Wetzlar, Germany            | <a href="https://www.leica-microsystems.com">https://www.leica-microsystems.com</a><br>(accessed on: 20 August 2021)                                                                       |
| Image Lab software v6.1               | Bio-Rad, Hercules, CA, USA                      | <a href="https://www.bio-rad.com/de-de/product/image-lab-software?ID=KRE6P5E8Z">https://www.bio-rad.com/de-de/product/image-lab-software?ID=KRE6P5E8Z</a><br>(accessed on: 20 August 2021) |

## References

1. Backert, S.S.; Ziska, E.E.; Brinkmann, V.V.; Zimny-Arndt, U.U.; Fauconnier, A.; Jungblut, P.P.; Naumann, M.M.; Meyer, T.F. Translocation of the *Helicobacter pylori* CagA protein in gastric epithelial cells by a type IV secretion apparatus. *Cell. Microbiol.* **2000**, *2*, 155–164, doi:10.1046/j.1462-5822.2000.00043.x
2. Fischer, W.; Windhager, L.; Rohrer, S.; Zeiller, M.; Karnholz, A.; Hoffmann, R.; Zimmer, R.; Haas, R. Strain-specific genes of *Helicobacter pylori*: genome evolution driven by a novel type IV secretion system and genomic island transfer. *Nucleic Acids Res.* **2010**, *38*, 6089–6101, doi:10.1093/nar/gkq378.
3. von Bubnoff, N.; Veach, D.R.; Miller, W.T.; Li, W.; Sanger, J.; Peschel, C.; Bornmann, W.G.; Clarkson, B.; Duyster, J. Inhibition of wild-type and mutant Bcr-Abl by pyrido-pyrimidine-type small molecule kinase inhibitors. *Cancer Res.* **2003**, *63*, 6395–6404.
4. Tegtmeyer, N.; Wittelsberger, R.; Hartig, R.; Wessler, S.; Martinez-Quiles, N.; Backert, S. Serine phosphorylation of cortactin controls focal adhesion kinase activity and cell scattering induced by *Helicobacter pylori*. *Cell Host Microbe* **2011**, *9*, 520–531.
5. Tamas, P.; Solti, Z.; Bauer, P.; Illes, A.; Sipeki, S.; Bauer, A.; Downward, J.; Buday, L. Mechanism of epidermal growth factor regulation of Vav2, a guanine nucleotide exchange factor for Rac. *J. Biol. Chem.* **2003**, *278*, 5163–5171.
6. Schneider, C.A.; Rasband, W.S.; Eliceiri, K.W. NIH Image to ImageJ: 25 years of image analysis. *Nat. Methods* **2012**, *9*, 671–675, doi:10.1038/nmeth.2089.
